# Supplementary material for: Virus-Host and CRISPR Dynamics in Archaea-Dominated Hypersaline Lake Tyrrell, Victoria, Australia
Source: Hindawi journal article supplement (doi:10.1155/2013/370871), 2013-01-01
Supplement: f1 [file 370871.f1.pdf]

| OTU_SequenceID          | A2007At1_0.1 | A2007At1_0.8 | A2007At1_3.0 | A2007At2_0.1 |
|-------------------------|--------------|--------------|--------------|--------------|
| 1 GL982576.1            | 7.130537624  | 0            | 0            | 0            |
| 74 AF435111.1.1471      | 9.594441433  | 8.03533073   | 0            | 0            |
| 21 FN391220.1.1345      | 0            | 2.09553546   | 0            | 0            |
| 184 AY838278.1.1473     | 0            | 1.78015737   | 0            | 0            |
| 36 CU467230.3.1357      | 0            | 0            | 0            | 0            |
| 268 FN391240.1.1345     | 0            | 0            | 0            | 0            |
| 2 GL982569.1            | 0            | 0            | 0            | 0            |
| 638 AJ270249.1.1461_m01 | 5.654659242  | 4.5001624    | 0            | 0            |
| 26 CU467268.2.1356      | 0            | 2.82582957   | 0            | 0            |
| 17 FN393543.1.1362      | 11.32410191  | 9.52735198   | 0            | 100          |
| 20 CU467211.3.1344      | 0            | 2.50940372   | 0            | 0            |
| 564 AY862784.1.1402     | 0            | 4.71076372   | 0            | 0            |
| 176 CU467143.1.1344     | 10.32868477  | 6.25412559   | 0            | 0            |
| 112 FN391263.1.1344     | 0            | 4.08315085   | 0            | 0            |
| 254 FN391293.1.1345     | 0            | 0            | 0            | 0            |
| 107 FN391274.1.1344     | 0            | 0            | 0            | 0            |
| 211 EF459716.1.1519     | 16.48598039  | 8.68913779   | 100          | 0            |
| 179 EF533958.1.1551     | 0            | 0            | 0            | 0            |
| 643 EF468473.1.1470_m01 | 0            | 3.56241028   | 0            | 0            |
| 482 GQ282618.1.1471     | 0            | 2.30299347   | 0            | 0            |
| 839 FN393543.1.1362_m76 | 0            | 2.61732379   | 0            | 0            |
| 140 EF690618.1.1445     | 0            | 1.5716516    | 0            | 0            |
| 88 AM947502.1.1345      | 0            | 0            | 0            | 0            |
| 98 CU467180.3.1354      | 0            | 1.36209805   | 0            | 0            |
| 289 DQ432495.1.1399     | 9.350514956  | 4.08315085   | 0            | 0            |
| 316 EF690563.1.1439     | 0            | 4.18687985   | 0            | 0            |
| 22 EF459702.1.1440      | 0            | 0            | 0            | 0            |
| 101 GQ282622.1.1467     | 0            | 0            | 0            | 0            |
| 58 AM947497.1.1343      | 0            | 0            | 0            | 0            |
| 30 CU467261.1.1348      | 0            | 0            | 0            | 0            |
| 287 EU562182.1.1478     | 8.616271621  | 5.65165914   | 0            | 0            |
| 65 DQ432537.1.1395      | 0            | 0            | 0            | 0            |
| 59 AM947487.1.1342      | 0            | 1.56746053   | 0            | 0            |
| 44 AM947477.1.1344      | 0            | 0            | 0            | 0            |
| 842 EF468473.1.1470_m34 | 0            | 0            | 0            | 0            |
| 76 EU722666.1.1246      | 0            | 0            | 0            | 0            |
| 163 EF690613.1.1440     | 0            | 0            | 0            | 0            |
| 69 AM947448.1.1343      | 0            | 0            | 0            | 0            |
| 199 AM947454.1.1343     | 0            | 0            | 0            | 0            |
| 41 CU467267.2.1356      | 4.422707338  | 3.01337999   | 0            | 0            |
| 187 EF690583.1.1440     | 0            | 0            | 0            | 0            |
| 154 CU467189.3.1357     | 6.026708717  | 4.70866818   | 0            | 0            |
| 216 AY987828.1.1441     | 0            | 0            | 0            | 0            |
| 841 EF459716.1.1519_m39 | 0            | 0            | 0            | 0            |
| 840 FN391274.1.1344_m38 | 0            | 0            | 0            | 0            |
| 19 EU722669.1.1444      | 0            | 0            | 0            | 0            |
| 14 EF690585.1.1438      | 0            | 0            | 0            | 0            |
| 138 FJ429313.1.1489     | 0            | 0            | 0            | 0            |

|                                 |             |            |   |   |
|---------------------------------|-------------|------------|---|---|
| 133 EU931577.1.1473             | 0           | 0          | 0 | 0 |
| 208 AM947451.1.1344             | 0           | 0          | 0 | 0 |
| 82 AM947499.1.1344              | 0           | 0          | 0 | 0 |
| 222 AY498650.1.1371             | 0           | 0          | 0 | 0 |
| 180 FN391283.1.1344             | 0           | 0          | 0 | 0 |
| 173 EF690565.1.1442             | 0           | 0          | 0 | 0 |
| 39 AM947450.1.1345              | 0           | 0          | 0 | 0 |
| 34 GQ282621.1.1473              | 0           | 0          | 0 | 0 |
| 200 FN391291.1.1344             | 0           | 0          | 0 | 0 |
| 23 AM947468.1.1342              | 0           | 0          | 0 | 0 |
| 565 AM947493.1.1343             | 0           | 0          | 0 | 0 |
| 114 AM947496.1.1351             | 0           | 2.50835595 | 0 | 0 |
| 177 CU467118.3.1354             | 0           | 0          | 0 | 0 |
| 96 FN391257.1.1346              | 0           | 0          | 0 | 0 |
| 115 AM947444.1.1348             | 0           | 0          | 0 | 0 |
| 130 CU467153.1.1343             | 0           | 0          | 0 | 0 |
| 132 FN391289.1.1340             | 0           | 0          | 0 | 0 |
| 24 CU467116.3.1355              | 0           | 0          | 0 | 0 |
| 93 FJ172059.1.1341              | 5.649731434 | 3.76777276 | 0 | 0 |
| 265 CU467142.1.1344             | 0           | 0          | 0 | 0 |
| 54 AM947441.1.1346              | 0           | 0          | 0 | 0 |
| 87 AM947456.1.1341              | 0           | 0          | 0 | 0 |
| 61 CU467214.1.1346              | 0           | 0          | 0 | 0 |
| 44 AM180088.1772798.1774270     | 0           | 0          | 0 | 0 |
| 47 FN391220.1.1345              | 0           | 0          | 0 | 0 |
| 32 CU467207.1.1346              | 0           | 0          | 0 | 0 |
| 103 CU467197.3.1345             | 0           | 0          | 0 | 0 |
| 38 AM176545.1.1353              | 0           | 0          | 0 | 0 |
| 26 AM947443.1.1341              | 0           | 0          | 0 | 0 |
| 54 CU467264.1.1344              | 0           | 0          | 0 | 0 |
| 40 CU467180.3.1354              | 0           | 0          | 0 | 0 |
| 30 CU467114.3.1355              | 0           | 0          | 0 | 0 |
| 58 CU467266.1.1348              | 0           | 0          | 0 | 0 |
| 35 AM947446.1.1344              | 0           | 0          | 0 | 0 |
| 51 CU467178.3.1354              | 0           | 1.6753806  | 0 | 0 |
| 76 AM947441.1.1346              | 0           | 0          | 0 | 0 |
| 20 GL982569.1                   | 0           | 0          | 0 | 0 |
| 27 AM180088.1772798.1774270     | 0           | 0          | 0 | 0 |
| 525 AM180088.1772798.1774270_m0 | 0           | 0          | 0 | 0 |
| 54 CU467211.3.1344              | 0           | 0          | 0 | 0 |
| 535 AM180088.1772798.1774270_m0 | 0           | 0          | 0 | 0 |
| 563 AM180088.1772798.1774270_m3 | 0           | 0          | 0 | 0 |
| 18 CU467207.1.1346              | 5.415660573 | 2.40986578 | 0 | 0 |
| 11 CU467114.3.1355              | 0           | 0          | 0 | 0 |
| 36 AM947441.1.1346              | 0           | 0          | 0 | 0 |
| 253 CU467207.1.1346_m37         | 0           | 0          | 0 | 0 |
| 3 AM947487.1.1342               | 0           | 0          | 0 | 0 |
| 136 AM947450.1.1345             | 0           | 0          | 0 | 0 |
| 6 FN391234.1.1344               | 0           | 0          | 0 | 0 |

|     |                 |   |   |   |   |
|-----|-----------------|---|---|---|---|
| 431 | GL982576.1_m20  | 0 | 0 | 0 | 0 |
| 54  | FN393470.1.1364 | 0 | 0 | 0 | 0 |
| 59  | AM947441.1.1346 | 0 | 0 | 0 | 0 |
| 95  | AM947442.1.1345 | 0 | 0 | 0 | 0 |

| A2007At2_0.8 | A2007At2_3.0 | A2008At1_3.0 | A2008At2_0.8 | J2007At1_0.1 | J2007At1_0.8 |
|--------------|--------------|--------------|--------------|--------------|--------------|
| 0            | 0            | 0            | 0            | 52.0387008   | 1.87915656   |
| 0            | 4.94526494   | 0            | 1.76175739   | 0            | 1.26343407   |
| 0            | 4.85517731   | 4.52655466   | 2.46674234   | 0            | 4.0990371    |
| 0            | 0            | 13.3753788   | 0            | 0            | 6.69284036   |
| 0            | 3.73317682   | 3.00164295   | 0            | 0            | 1.14246698   |
| 0            | 0            | 1.76918667   | 0            | 0            | 1.27687486   |
| 0            | 0            | 0            | 0            | 47.9612992   | 0.36263246   |
| 0            | 3.38647594   | 0            | 7.89019154   | 0            | 1.24932124   |
| 0            | 0            | 3.77493941   | 6.68960218   | 0            | 2.11020371   |
| 33.2665777   | 11.8301439   | 3.29843462   | 3.1005238    | 0            | 2.79554949   |
| 0            | 2.80363626   | 6.12180985   | 3.80057386   | 0            | 4.08546191   |
| 0            | 2.50607409   | 1.8043584    | 0            | 0            | 0.57795388   |
| 16.6889186   | 6.04542601   | 0            | 2.39271892   | 0            | 0.7795657    |
| 0            | 0            | 0            | 8.22717435   | 0            | 0.80644728   |
| 0            | 0            | 1.01082615   | 6.61205383   | 0            | 1.54179279   |
| 0            | 0            | 0            | 0            | 0            | 0            |
| 28.9052069   | 12.7228304   | 2.88456442   | 0            | 0            | 1.04717179   |
| 0            | 0            | 1.59959143   | 0            | 0            | 1.03494067   |
| 0            | 3.49840299   | 0            | 3.92535619   | 0            | 1.07485981   |
| 0            | 0            | 3.82071085   | 0            | 0            | 2.12256923   |
| 0            | 4.25186318   | 0            | 0            | 0            | 0.85994161   |
| 0            | 0            | 0            | 7.04420961   | 0            | 0.5766098    |
| 0            | 0            | 0            | 0            | 0            | 0            |
| 0            | 0            | 0            | 0            | 0            | 0.85994161   |
| 21.1392968   | 3.00565095   | 1.37507046   | 3.09981882   | 0            | 0.80644728   |
| 0            | 4.16860037   | 0            | 5.97968233   | 0            | 1.04838146   |
| 0            | 0            | 0            | 0            | 0            | 0            |
| 0            | 0            | 0            | 0            | 0            | 0            |
| 0            | 0            | 3.90261764   | 2.46744732   | 0            | 2.24353633   |
| 0            | 3.32914744   | 2.85035629   | 5.42344921   | 0            | 2.15052607   |
| 0            | 0            | 0            | 0            | 0            | 0.80644728   |
| 0            | 0            | 0            | 0            | 0            | 0.49730915   |
| 0            | 0            | 0            | 0            | 0            | 0.84663523   |
| 0            | 0            | 0            | 0            | 0            | 0.41666443   |
| 0            | 0            | 0            | 0            | 0            | 0            |
| 0            | 0            | 0            | 0            | 0            | 0.59139467   |
| 0            | 0            | 0            | 0            | 0            | 0            |
| 0            | 2.90054872   | 1.59140075   | 2.60350942   | 0            | 1.30375643   |
| 0            | 0            | 0            | 0            | 0            | 0.68548019   |
| 0            | 0            | 0            | 2.04375137   | 0            | 0.40295482   |
| 0            | 0            | 0            | 0            | 0            | 0.32257891   |
| 0            | 0            | 0            | 0            | 0            | 0.56451309   |
| 0            | 0            | 0            | 4.36667677   | 0            | 0.51074994   |
| 0            | 4.94935983   | 0            | 0            | 0            | 0            |
| 0            | 0            | 0            | 0            | 0            | 0            |
| 0            | 0            | 0            | 0            | 0            | 0.34946049   |
| 0            | 0            | 0            | 0            | 0            | 0.61827625   |
| 0            | 0            | 0            | 0            | 0            | 0.64515782   |

|   |            |            |            |   |            |
|---|------------|------------|------------|---|------------|
| 0 | 2.93467282 | 2.03321561 | 0          | 0 | 0.91397358 |
| 0 | 0          | 0          | 0          | 0 | 0.41666443 |
| 0 | 0          | 0          | 0          | 0 | 0.41666443 |
| 0 | 0          | 0          | 0          | 0 | 0.71236176 |
| 0 | 0          | 0          | 2.18333839 | 0 | 0          |
| 0 | 0          | 0          | 0          | 0 | 0.80496879 |
| 0 | 0          | 0          | 0          | 0 | 1.35738518 |
| 0 | 0          | 0          | 0          | 0 | 0          |
| 0 | 0          | 0          | 0          | 0 | 0          |
| 0 | 0          | 0          | 0          | 0 | 0.36276687 |
| 0 | 0          | 0          | 0          | 0 | 0          |
| 0 | 0          | 0          | 0          | 0 | 0.80644728 |
| 0 | 0          | 2.56850058 | 0          | 0 | 1.08615007 |
| 0 | 0          | 0          | 0          | 0 | 0          |
| 0 | 0          | 0          | 0          | 0 | 0.43010521 |
| 0 | 0          | 0          | 0          | 0 | 0          |
| 0 | 0          | 0          | 0          | 0 | 0          |
| 0 | 0          | 0          | 0          | 0 | 0.75174327 |
| 0 | 2.75859245 | 0          | 0          | 0 | 0.57768507 |
| 0 | 0          | 0          | 0          | 0 | 0          |
| 0 | 0          | 0          | 0          | 0 | 1.85469433 |
| 0 | 0          | 0          | 0          | 0 | 0          |
| 0 | 0          | 0          | 0          | 0 | 0          |
| 0 | 0          | 6.04134847 | 2.39483387 | 0 | 3.45791152 |
| 0 | 0          | 3.66556976 | 0          | 0 | 2.23103639 |
| 0 | 0          | 4.69277727 | 2.00427221 | 0 | 1.76074322 |
| 0 | 0          | 2.2707453  | 0          | 0 | 1.97552701 |
| 0 | 2.47058502 | 4.74192134 | 0          | 0 | 2.08049957 |
| 0 | 0          | 3.47670234 | 0          | 0 | 2.34918092 |
| 0 | 0          | 2.0004529  | 3.59401327 | 0 | 1.46504589 |
| 0 | 0          | 0          | 0          | 0 | 1.69340487 |
| 0 | 0          | 0          | 0          | 0 | 1.62526008 |
| 0 | 0          | 0          | 0          | 0 | 1.65321692 |
| 0 | 0          | 0          | 0          | 0 | 1.10147257 |
| 0 | 0          | 0          | 0          | 0 | 1.19623013 |
| 0 | 0          | 0          | 0          | 0 | 1.29018124 |
| 0 | 0          | 0          | 0          | 0 | 0.26881576 |
| 0 | 4.57945456 | 6.21431634 | 4.15518129 | 0 | 4.93236596 |
| 0 | 2.50743905 | 0          | 0          | 0 | 0.73924334 |
| 0 | 3.24861456 | 1.63669039 | 0          | 0 | 1.54569061 |
| 0 | 0          | 0          | 4.50626379 | 0 | 0          |
| 0 | 0          | 0          | 0          | 0 | 0          |
| 0 | 0          | 1.40831498 | 0          | 0 | 1.42472352 |
| 0 | 2.56886244 | 2.54200132 | 1.26685795 | 0 | 1.58574416 |
| 0 | 0          | 0          | 0          | 0 | 0          |
| 0 | 0          | 0          | 0          | 0 | 0          |
| 0 | 0          | 0          | 0          | 0 | 0.41666443 |
| 0 | 0          | 0          | 0          | 0 | 0.71222735 |
| 0 | 0          | 0          | 0          | 0 | 0.38964844 |

|   |   |   |   |   |            |
|---|---|---|---|---|------------|
| 0 | 0 | 0 | 0 | 0 | 0          |
| 0 | 0 | 0 | 0 | 0 | 0          |
| 0 | 0 | 0 | 0 | 0 | 0.56451309 |
| 0 | 0 | 0 | 0 | 0 | 0          |

[illegible]

[illegible]



|   |   |   |   |   |   |
|---|---|---|---|---|---|
| 0 | 0 | 0 | 0 | 0 | 0 |
| 0 | 0 | 0 | 0 | 0 | 0 |
| 0 | 0 | 0 | 0 | 0 | 0 |
| 0 | 0 | 0 | 0 | 0 | 0 |

| J2009Bt1_0.8 | J2009Bt2_0.8 | J2009Bt3_0.8 | J2010A_0.1_1 | J2010A_3.0_1 | J2010Bt1_0.1 |
|--------------|--------------|--------------|--------------|--------------|--------------|
| 0            | 1.08716364   | 0            | 22.5470678   | 0            | 34.3727114   |
| 0            | 1.79118292   | 1.72408034   | 0.73282856   | 0            | 2.57444435   |
| 1.32909704   | 2.34548325   | 2.18891957   | 2.47094758   | 9.62203334   | 1.42240989   |
| 3.87936262   | 7.84595282   | 7.79426828   | 5.60867519   | 19.6878154   | 1.66927442   |
| 0            | 0.98576309   | 0.91715285   | 0.52575751   | 2.30798114   | 0.58777268   |
| 7.92486236   | 5.030216     | 4.2706756    | 0            | 0            | 1.15203446   |
| 0            | 0            | 0            | 9.28634712   | 0            | 6.37039789   |
| 8.42448643   | 6.52638456   | 6.38165806   | 1.68155968   | 0            | 1.93964985   |
| 9.07023841   | 4.68960542   | 4.21945978   | 1.39989045   | 1.35806623   | 1.21081173   |
| 7.20695593   | 1.83711941   | 1.77947136   | 1.97281206   | 1.70867651   | 2.29231346   |
| 2.36290655   | 5.37218767   | 5.00801639   | 3.29763456   | 10.9961916   | 1.38714353   |
| 0            | 0            | 0            | 0            | 0            | 0.44670724   |
| 0            | 0            | 1.11227398   | 0.40399523   | 0            | 1.36363262   |
| 8.80951226   | 0            | 4.97711989   | 0            | 0            | 0.83463721   |
| 14.9426402   | 4.23466402   | 3.21629776   | 0.88315237   | 0            | 2.24529165   |
| 0            | 0            | 0            | 1.53123588   | 0            | 2.59795526   |
| 0            | 0            | 0            | 1.09877308   | 0            | 1.3851451    |
| 0            | 0            | 0            | 0            | 0            | 0            |
| 0            | 3.0382736    | 3.00698094   | 0.8173857    | 0            | 1.6222526    |
| 0            | 3.16383335   | 3.85148526   | 1.56900473   | 4.69057058   | 0.90505238   |
| 1.69653901   | 0            | 0.86204017   | 0            | 0            | 0.79937085   |
| 7.01899057   | 4.25133726   | 4.10422419   | 0.51664413   | 0.79923539   | 0.83463721   |
| 0            | 0            | 0            | 0.45097142   | 0            | 0            |
| 0            | 0            | 0            | 1.05226665   | 0            | 0.45846269   |
| 1.45339672   | 0.74655306   | 0            | 0            | 0            | 0.56426178   |
| 4.89558827   | 2.00555321   | 1.74439966   | 0            | 0            | 0.54075087   |
| 0            | 0            | 0            | 0            | 0            | 0.74059358   |
| 0            | 0            | 0            | 0            | 0            | 0.41144088   |
| 4.24074119   | 2.72046113   | 1.44629019   | 3.12786261   | 4.2965607    | 0.48185605   |
| 3.24209939   | 1.73367723   | 1.79366705   | 0            | 2.51571407   | 0.76410449   |
| 0            | 1.36006043   | 1.36306449   | 0            | 0            | 0.94043629   |
| 0            | 0            | 0.66719738   | 0            | 0            | 1.140279     |
| 0            | 0.83740523   | 0            | 1.62537616   | 0            | 0.3291527    |
| 0            | 0.71354684   | 0            | 0.52613332   | 0            | 0            |
| 0            | 0            | 1.7808631    | 0            | 0            | 0            |
| 0            | 0            | 0            | 0            | 0            | 0.89341448   |
| 0            | 0            | 0            | 0            | 0            | 0.43495179   |
| 0            | 1.3168461    | 0            | 0.90194284   | 3.28276548   | 0.54075087   |
| 0            | 0            | 0            | 1.96360473   | 0            | 0.22335362   |
| 0            | 0            | 0            | 0            | 0            | 0.74059358   |
| 0            | 0            | 0.86259686   | 0            | 0            | 0.95219175   |
| 0            | 0            | 0            | 0.45097142   | 0            | 0            |
| 4.72823846   | 0            | 2.69745925   | 0            | 0            | 0.61128359   |
| 0            | 0            | 0            | 0            | 0            | 0            |
| 0            | 0            | 0            | 0            | 0            | 0            |
| 0            | 0            | 0            | 0            | 0            | 0            |
| 0            | 0            | 0            | 0            | 0            | 0            |
| 0            | 0            | 0            | 0            | 0            | 0            |

|            |            |            |            |            |            |
|------------|------------|------------|------------|------------|------------|
| 0          | 1.05415742 | 0.84728779 | 0          | 0          | 0.38792997 |
| 0          | 0          | 0          | 0.68585237 | 0          | 0          |
| 0          | 0          | 0          | 0          | 0          | 0          |
| 0          | 0          | 0          | 0          | 0          | 0          |
| 0          | 0          | 0          | 0          | 0          | 0.3291527  |
| 0          | 0.95173606 | 0          | 0          | 0          | 0          |
| 0          | 2.21039594 | 2.13464193 | 1.96351077 | 0          | 0.39968542 |
| 0          | 0          | 0          | 0          | 0          | 0          |
| 0          | 0          | 0          | 0          | 0          | 0          |
| 0          | 0          | 0          | 0          | 0          | 0          |
| 0          | 0          | 0          | 0          | 0          | 0.36441906 |
| 0          | 0          | 0          | 0          | 0          | 0.21159817 |
| 0          | 0          | 0          | 0          | 0          | 0          |
| 0          | 0          | 0          | 0          | 0          | 0          |
| 0          | 0          | 0          | 0          | 0          | 0.30564179 |
| 0          | 0          | 0          | 0          | 0          | 0          |
| 0          | 0          | 0          | 0          | 0          | 0          |
| 0          | 0          | 0          | 0          | 0          | 0          |
| 0          | 0.91736876 | 1.15430436 | 0          | 0          | 1.25783354 |
| 0          | 0          | 0          | 0          | 0          | 0          |
| 0          | 0          | 1.69040037 | 1.75662764 | 0          | 0.52899541 |
| 0          | 0          | 0          | 0          | 0          | 0.27037543 |
| 0          | 0          | 0          | 0          | 0          | 0          |
| 0          | 1.89734725 | 2.04417921 | 2.16081077 | 7.31697802 | 0.72883813 |
| 0          | 2.67520518 | 2.88450833 | 1.3526324  | 0          | 0.69357177 |
| 0          | 2.50677138 | 2.21202236 | 1.18379998 | 5.8316388  | 0.54075087 |
| 0          | 2.04060105 | 2.28216576 | 0.90194284 | 3.14525213 | 1.1167681  |
| 0          | 2.14234188 | 2.58500713 | 0          | 0          | 0.62303904 |
| 0          | 2.17568837 | 2.56858466 | 1.23077617 | 4.45016604 | 0.79937085 |
| 5.86573209 | 1.93103401 | 1.80146076 | 0.53552856 | 1.69014634 | 0.6583054  |
| 0          | 0          | 0          | 1.21189174 | 0          | 0          |
| 0          | 0          | 0          | 0          | 0          | 0          |
| 0          | 1.80241184 | 0          | 0          | 0          | 0          |
| 0          | 1.02013039 | 1.00093525 | 0.55422509 | 0          | 0          |
| 0          | 0.98610336 | 0          | 0.86436189 | 0          | 0          |
| 0          | 0          | 0          | 0          | 0          | 0          |
| 0          | 0          | 0          | 1.65346792 | 0          | 2.01018257 |
| 1.757173   | 2.4148984  | 2.44666874 | 3.00638219 | 9.29092851 | 1.64576351 |
| 0          | 0          | 1.05660461 | 0          | 0          | 0          |
| 0          | 1.29200637 | 1.55039191 | 0.91124413 | 3.68701572 | 1.1167681  |
| 0          | 2.60715112 | 0          | 0          | 0          | 0.98745811 |
| 0          | 0          | 0          | 0          | 0          | 0          |
| 0          | 2.58163085 | 2.69662421 | 0.78919999 | 3.322264   | 1.15203446 |
| 1.15143945 | 1.69794885 | 1.27455019 | 1.21179779 | 0          | 0.90516993 |
| 0          | 0          | 0          | 0          | 0          | 0          |
| 0          | 0          | 0          | 0          | 0          | 0          |
| 0          | 1.46180125 | 0          | 1.39942069 | 0          | 0.54075087 |
| 0          | 0          | 0          | 1.02389303 | 0          | 0          |
| 0          | 0          | 0          | 1.31523936 | 0          | 0.16457635 |

|   |   |   |            |   |            |
|---|---|---|------------|---|------------|
| 0 | 0 | 0 | 4.77268692 | 0 | 3.17385493 |
| 0 | 0 | 0 | 1.79420859 | 0 | 0          |
| 0 | 0 | 0 | 0.87366318 | 0 | 0.30564179 |
| 0 | 0 | 0 | 0.40399523 | 0 | 0          |

| J2010Bt2 0.1 | J2010Bt2 3.0 | J2010Bt3.5 0 | J2010Bt3 0.1 | J2010Bt3 0.8 | J2010Bt4 3.0 |
|--------------|--------------|--------------|--------------|--------------|--------------|
| 14.1034636   | 1.87367022   | 22.3450606   | 39.4244056   | 4.32184865   | 4.01952605   |
| 3.42478541   | 2.23646442   | 5.36989457   | 2.75681771   | 4.84546303   | 3.18673433   |
| 2.13458213   | 4.12844355   | 0.94506188   | 1.07342641   | 2.76318564   | 4.30793011   |
| 2.10485258   | 5.39054392   | 1.09521189   | 0.77508299   | 2.88118878   | 4.54854853   |
| 1.02864264   | 2.6568753    | 0.90090011   | 0.67972237   | 1.92485256   | 2.97454147   |
| 1.53999101   | 1.64467861   | 0            | 0.83861438   | 1.36207843   | 1.55264949   |
| 2.91302083   | 0.34951807   | 2.68468231   | 4.92895602   | 0.58936086   | 0            |
| 1.98587489   | 1.87453794   | 2.76426182   | 1.43568241   | 2.51447536   | 1.72704407   |
| 1.89674568   | 2.35464803   | 0.86539404   | 0.86402694   | 2.60589178   | 2.25007414   |
| 3.0680902    | 2.28939541   | 0.998056     | 1.14979114   | 1.66330731   | 3.80349189   |
| 2.12269031   | 3.26948641   | 1.53682959   | 1.12444211   | 3.09073931   | 3.31795281   |
| 1.01675082   | 2.18648368   | 1.77530315   | 1.06097425   | 3.61448466   | 6.2901895    |
| 1.89074031   | 1.46514711   | 2.40231196   | 1.21338606   | 2.134796     | 1.78328055   |
| 1.20696052   | 1.34002173   | 0.89206775   | 0.82571751   | 1.51911035   | 1.19971175   |
| 2.00377209   | 0.6767357    | 1.30710006   | 1.28320706   | 1.54543514   | 0            |
| 0.8443194    | 0.1238238    | 1.28934703   | 2.02588904   | 0            | 0            |
| 1.68697394   | 1.91184995   | 1.25322271   | 0.92063341   | 1.75406888   | 3.4173654    |
| 1.84905948   | 1.80538057   | 3.00264706   | 1.60734423   | 2.72415685   | 0            |
| 1.63488775   | 1.20431014   | 1.978094     | 1.03530757   | 2.09511236   | 1.3192527    |
| 1.15945269   | 2.24488131   | 1.04204112   | 0.8194279    | 1.51911035   | 1.90358976   |
| 0.87999486   | 0.84559423   | 0.31796474   | 0.66047236   | 0.78581448   | 1.45753915   |
| 1.14756087   | 0.90937174   | 1.18344711   | 0.64789314   | 1.36194746   | 0.81850211   |
| 0            | 1.18704249   | 2.44620876   | 0.96567717   | 0            | 1.64361124   |
| 0.71945526   | 1.41013359   | 0.90081178   | 0.48912819   | 1.03465573   | 1.30158277   |
| 1.01669136   | 1.73422743   | 1.17461475   | 0            | 1.33588461   | 2.28802608   |
| 1.10593949   | 1.84555605   | 0.42395299   | 0.29853401   | 1.427432     | 1.80233335   |
| 0.67188797   | 0.34370434   | 0.5564383    | 0.43201347   | 0.55007013   | 0            |
| 0.5826993    | 0            | 0            | 0.42566033   | 0            | 0            |
| 0.54702383   | 0.65374109   | 0.55626165   | 0.55272311   | 0.73342685   | 0.59893397   |
| 1.4270187    | 2.02231085   | 0.45045005   | 0.49554486   | 1.59782277   | 2.02589644   |
| 1.43296461   | 1.19710806   | 1.73078808   | 0.79401534   | 2.22608144   | 1.24181229   |
| 0.8264222    | 0.36166616   | 0.52994124   | 0.5399533    | 0            | 0            |
| 0.45188925   | 0            | 0.37961457   | 0.17153476   | 0.45839178   | 0            |
| 0.79675211   | 0            | 0.92739717   | 0.36841854   | 1.13916905   | 0            |
| 1.05242629   | 0.76177237   | 1.11278828   | 0.93372087   | 1.24407529   | 0            |
| 0.79669265   | 0            | 0.49461182   | 0.48906466   | 0.56316704   | 0            |
| 0.38053832   | 0            | 0.72407638   | 0.57813567   | 0.62865158   | 0            |
| 0.8978326    | 1.33906723   | 0.47694711   | 0            | 1.12633408   | 1.472597     |
| 0.22594463   | 0            | 0.30030004   | 0.41295405   | 0            | 0            |
| 0.41621379   | 0.14794645   | 0.30913239   | 0.43201347   | 0.19645362   | 0            |
| 0.92161624   | 0.73643492   | 1.28033803   | 0.83855085   | 1.1000093    | 1.05220621   |
| 0.36270059   | 0.59291384   | 0.16781473   | 0            | 0.40600415   | 0            |
| 0.87987594   | 1.00325916   | 0.68865864   | 0.4636521    | 1.06071857   | 0.9985818    |
| 0.58858575   | 0.65261306   | 0            | 0            | 0            | 0            |
| 0.24378236   | 0            | 0.8918911    | 0.90837185   | 0            | 0            |
| 0.28540374   | 0            | 0            | 0            | 0            | 0            |
| 0.32096029   | 0            | 0            | 0            | 0            | 0            |
| 0.19621507   | 0            | 0.5564383    | 0            | 0            | 0            |

|            |            |            |            |            |            |
|------------|------------|------------|------------|------------|------------|
| 0.7432389  | 1.36735494 | 0.54760595 | 0.27953813 | 0.73342685 | 1.14547273 |
| 0.37459241 | 0          | 0          | 0          | 0          | 0          |
| 0.273393   | 0.45026049 | 0          | 0          | 0          | 0.61706485 |
| 0.41615433 | 0.80498488 | 0.23847356 | 0          | 0          | 1.09200197 |
| 0.40420305 | 0.46379694 | 0          | 0          | 0.64174849 | 0          |
| 0.72540117 | 0.56818379 | 1.37784722 | 0.501898   | 1.19181862 | 0          |
| 0.70756344 | 1.19780224 | 0.282547   | 0.42566033 | 0.98200616 | 1.27054514 |
| 0.46372162 | 0          | 0          | 0.62877019 | 0          | 0          |
| 0.29129019 | 0.1593136  | 0          | 0          | 0          | 0          |
| 0.24378236 | 0          | 0          | 0.22871301 | 0.26193816 | 0          |
| 0          | 0          | 0.23838523 | 0.34306952 | 0          | 0          |
| 0.21999872 | 0          | 0.22080885 | 0.26664125 | 0.35361651 | 0          |
| 0.4221597  | 1.12057506 | 0          | 0          | 0.47135772 | 1.3573583  |
| 0          | 0          | 0.38862357 | 0          | 0          | 0          |
| 0.40432196 | 0          | 0.30913239 | 0          | 0.43206699 | 0          |
| 0.26156064 | 0          | 0.30913239 | 0          | 0          | 0          |
| 0          | 0          | 0          | 0          | 0          | 0          |
| 0.29729556 | 0.84533392 | 0          | 0          | 0          | 0.62874238 |
| 1.53999101 | 1.27424847 | 1.9957587  | 1.13079525 | 2.65841038 | 2.04372003 |
| 0.19026916 | 0          | 0          | 0          | 0          | 0          |
| 0.67176905 | 1.41533992 | 0.42395299 | 0.24141929 | 1.07394645 | 0          |
| 0.13675596 | 0          | 0          | 0          | 0          | 0          |
| 0.30918738 | 0.61972642 | 0          | 0          | 0.51077941 | 0.78592797 |
| 1.1653986  | 3.10114852 | 0.70649999 | 0.77508299 | 2.00382692 | 3.03830688 |
| 0.86804358 | 2.15272933 | 0.57392636 | 0.33036324 | 1.19168765 | 1.83275637 |
| 0.94539989 | 1.87818237 | 1.02455306 | 0.62254411 | 1.4926546  | 2.27404379 |
| 1.29614919 | 1.95627727 | 1.14802937 | 0.74331729 | 1.78091754 | 1.96074816 |
| 0.78486028 | 1.74446654 | 0.78599118 | 0.46371563 | 1.27040007 | 0          |
| 1.18918225 | 2.30432021 | 0.75075009 | 0.62889725 | 1.59756083 | 2.19568147 |
| 1.04053447 | 1.29568118 | 0.37087054 | 0.34935913 | 0.95581234 | 1.20309208 |
| 0.49351063 | 1.02798921 | 0          | 0.25412557 | 0          | 0          |
| 0.60648295 | 0          | 0          | 0          | 0.91678356 | 0          |
| 0.51134837 | 0.96230272 | 0.28245868 | 0          | 0.69413612 | 0          |
| 0.52324019 | 0.67699602 | 0.30030004 | 0.22864948 | 0.58936086 | 0          |
| 0.35080876 | 0          | 0.33562945 | 0.2794746  | 0.44529487 | 0          |
| 0.4756729  | 0          | 0.41512064 | 0          | 0.78581448 | 0          |
| 0.7432389  | 0          | 0.79464689 | 1.07317228 | 0          | 0          |
| 2.29512174 | 4.81906279 | 1.15695005 | 1.11179937 | 2.94667332 | 4.70711699 |
| 0.75513073 | 1.36197507 | 1.04204112 | 0.67343276 | 1.10014027 | 1.33676898 |
| 1.51620736 | 2.06517627 | 1.74871776 | 1.08625975 | 2.29195889 | 2.36869318 |
| 1.08810176 | 0.72810479 | 1.20111182 | 0.87666968 | 1.12620311 | 0          |
| 0          | 0          | 1.12162063 | 0.79376122 | 0          | 0          |
| 1.59350421 | 1.71904231 | 1.82812063 | 1.22609234 | 1.95117735 | 2.05893154 |
| 1.01675082 | 1.70186144 | 1.17470308 | 0.73048395 | 1.9776331  | 2.0171383  |
| 0          | 0          | 0          | 0          | 0          | 1.05819862 |
| 0          | 0.75621896 | 0          | 0          | 0          | 0          |
| 0.70161753 | 0          | 0.68009126 | 0.46377916 | 0.53684226 | 0          |
| 0.33891694 | 0          | 0          | 0          | 0          | 0          |
| 0.20216098 | 0          | 0.15898237 | 0          | 0          | 0          |

|            |            |            |            |            |            |
|------------|------------|------------|------------|------------|------------|
| 1.25458727 | 0          | 2.54371794 | 4.24376995 | 0          | 0          |
| 0          | 0          | 0          | 0.89579263 | 0          | 0          |
| 0.35663576 | 0.69018538 | 0.4945235  | 0          | 0.58922989 | 0.70418532 |
| 0          | 0          | 0          | 0          | 0          | 0          |
